# **A study of thermally-induced sex reversal in casque-headed lizards**

Gabriel Suárez-Varón<sup>1</sup>, Eva Mendoza-Cruz<sup>2</sup>, Armando Acosta<sup>3</sup>, Maricela Villagrán-Santa Cruz<sup>2</sup>,  
Diego Cortez (ORCID: 0000-0003-0654-6349)<sup>3\*</sup>, Oswaldo Hernández-Gallegos<sup>1</sup>

- 1) Laboratorio de Herpetología, Facultad de Ciencias, Universidad Autónoma del Estado de México, Instituto Literario # 100 Centro, Toluca, Estado de México, C.P. 50000, México.
- 2) Laboratorio de Biología Tisular y Reproductora, Departamento de Biología Comparada, Facultad de Ciencias, Universidad Nacional Autónoma de México, C. P. 04510, Ciudad de México, México.
- 3) Centro de Ciencias Genómicas, UNAM, C.P. 62210, Cuernavaca, México.

\*Corresponding author: Diego Cortez ([dcortez@ccg.unam.mx](mailto:dcortez@ccg.unam.mx))

Emails: [biogabrielsv@gmail.com](mailto:biogabrielsv@gmail.com), [EvaMendoza@ciencias.unam.mx](mailto:EvaMendoza@ciencias.unam.mx), [agalariept84@gmail.com](mailto:agalariept84@gmail.com),  
[maricelavisa@yahoo.com.mx](mailto:maricelavisa@yahoo.com.mx), [dcortez@ccg.unam.mx](mailto:dcortez@ccg.unam.mx), [ohg070606@gmail.com](mailto:ohg070606@gmail.com).

**Keywords:** sex chromosomes; sex reversal; temperature-dependent sex determination; casque-headed lizards; development of gonads; embryonic development.

## ABSTRACT

Non-avian reptiles, unlike mammals and birds, have undergone numerous sex determination turnovers. For example, casque-headed lizards replaced the ancestral XY system shared across pleurodonts with a new pair of XY chromosomes. However, the evolutionary forces that triggered this transition have remained unclear. An interesting evolutionary hypothesis suggests that species with intermediate states, with sex chromosomes but also thermal-induced sex reversal at specific incubation temperatures, could be more susceptible to sex determination turnovers. We contrasted genotypic data (presence/absence of the Y chromosome) against the histology of gonads of embryos from stages 35-37 incubated at various temperatures, including typical male-producing (26°C) and female-producing (32°C) temperatures. We observed perfect concordance between genotype and phenotype at all temperatures. However, analysis of transcriptomic data from embryos incubated at 26°C and 32°C identified transcript variants of the chromatin modifiers *JARID2* and *KDM6B* that have been linked to temperature-dependent sex determination in other reptiles. Besides, our work reports for the first time to our knowledge the histology of gonads, including morphological changes, from stages 35-37 of development in the *Corytophanidae* family. We also observed that all embryos developed hemipenes, suggesting sex-linked developmental heterochrony. Our work tested the validity of a mixed sex determination system in the *Corytophanidae* family. We showed that XY chromosomes are dominant, however, our work supports the hypothesis of a conserved transcriptional response to incubation temperatures across non-avian reptiles that could be the reminiscence of an ancestral sex determination system.

## INTRODUCTION

Although squamate reptiles are the most species-rich group among non-avian reptiles (96.3% of the diversity [1]) their sex-determination mechanisms remain poorly understood. In squamate reptiles, sex determination occurs by two general strategies: genotypic sex determination (GSD, the norm for Squamata) and temperature-dependent sex determination (TSD). In the first strategy, specific sex chromosomes control the development of the gonads, whereas in the second strategy, external cues, typically ambient temperature, regulate the sexual differentiation of ovaries and testis [2]. In many TSD species, ~26°C produces 100% of males (i.e., male-producing temperature), whereas ~32°C produces 100% of females (i.e., female-producing temperature). For many years it was assumed that GSD and TSD were mutually exclusive; however, as more non-avian reptiles have been

studied in detail, we now understand that GSD and TSD represent the endpoints of a continuum [3, 4] with some lizards showing temperature-induced sex reversal where ambient temperature can alter the genetic pathways of gonad differentiation [5]. Several squamate reptiles such as *Niveoscincus ocellatus* [6], *Eulamprus heatwolei* [7, 8], *Pogona vitticeps* [9, 10], and *Bassiana duperreyi* [4, 11] show intermediate states where the sex of the offspring is controlled by sex chromosomes under medium incubation temperatures but sex-linked genes can be overridden by alternative signaling cascades at elevated (*P. vitticeps* [10]) or lowered incubation temperatures (*B. duperreyi* [12]).

Mammals and birds have stable sex chromosomes. Non-avian reptiles, however, have undergone numerous sex determination turnovers with lineages shifting from TSD to GSD and vice versa [13]. A general explanation of why sex determination turnovers are more common in reptiles is lacking. Analyses of ancestral states indicated that the last common ancestor of all reptiles had TSD [14, 15] and, subsequently, GSD systems originated in some lineages [14, 15]. It is possible, therefore, that the TSD systems we observe nowadays in turtles, crocodiles, and some lizards derive from the ancestral TSD system [8, 16].

Non-avian reptiles are thought to have evolved temperature-dependent sex determination because their embryos develop in a close relationship with the environment [17]. An interesting evolutionary hypothesis suggests that species with intermediate states showing sex chromosomes and thermal-induced sex reversal may be more susceptible to sex determination turnovers [18] because the ancestral TSD system is still present but has been overridden by, for example, sex chromosomes [8]. This hypothesis is supported by observations in *P. vitticeps* where TSD becomes the dominant sex determination system when the ZW chromosomes are lost [9]. Moreover, three phylogenetically distant reptiles, a turtle (*Trachemys scripta*), a crocodile (*Alligator mississippiensis*), and an acrodont lizard (*P. vitticeps*), showed the same temperature-dependent spliced isoforms of two members of the *Jumonji* family of chromatin modifiers, *KDM6B* and *JARID2* [16]; *KDM6B* plays an important role in temperature-dependent sex determination signaling cascade because its knockdown results in a male-to-female sex reversal at male-producing temperatures in *T. scripta* [19]. *JARID2* has been proposed to play an important role in the temperature-dependent sex determination pathway in non-avian reptiles [20].

Pleurodonts, including iguanas, spiny lizards, and *Anolis* have a common XY system [21, 22]. In *Anolis carolinensis*, researchers characterized a highly degenerated Y chromosome and a perfect dosage compensation mechanism that over-expresses the X chromosome in males [23]. In the pleurodont clade, however, casque-headed lizards (*Corytophanidae* family) replaced the ancestral XY system with a new pair of XY chromosomes [24, 25]. Moreover, initial observations performed in our laboratory with clutches of the Brown Basilisk (*Basiliscus vittatus*), a casque-headed lizard, indicated that female-biased offspring may occur at medium-high incubation temperatures (~29°C). In this study, we explored the proximate mechanisms of sex determination in a squamate reptile, tested whether *Basiliscus vittatus*, a casque-headed lizard, showed temperature-dependent sex reversal. Moreover, we also explored the possibility that *B. vittatus* exhibited genetic signatures of an ancestral temperature-dependent sex determination system.

## MATERIALS AND METHODS

### Animal collection

22 gravid females of *B. vittatus* were collected from a population that inhabits the tropical rainforest habitat at the community of “La Selva del Marinero” in Veracruz, México (18°26'36.3"N, 94°37'81.9"W, ca. 170 m a.s.l.; SEMARNAT Scientific Collector Permit 08-043). We sampled from April to July of 2018 and females were captured manually and with help of a noose. To evaluate the reproductive condition, both visual assessment and an abdominal palpation were performed (females with eggs showed multiple contours in the abdomen area). Gravid females showed the following morphometric data (mean ± standard error): LHC = 128.1 ± 1.4 mm, and weight 59.6 ± 2.3 g.

### Laboratory conditions

Gravid females were placed inside terrariums (100 cm width x 50 cm depth x 50 cm height) until the termination of oviposition. One female per terrarium at a thermal gradient between 20–40°C, a photoperiod of 12/12 h (photofase/scotophase), constant humidity, live insects as food, and water *ad libitum*. The terrariums were monitored daily. 82 eggs were collected and randomly assigned to three incubation temperatures, 26°C, 29°C, and 32°C. Eggs were incubated at the three temperatures in three Percival L-30 incubators until they reached relatively late developmental stages (35-37 according to the development table established by Dufaure and Hubert [26]). We chose these stages because gonads should be fully determined. 48 eggs (12, 18, 18 for 26°C, 29°C,

and 32°C, respectively) reached stages 35-37. The posterior part of the embryos was dissected and fixed using Bouin solution for 30 minutes, washed with water for 30 minutes, and stored in 10% formaldehyde for further histological analysis. The rest of the embryo's body was stored in DNA/RNA shield buffer by Zymo Research (Cat. No. R1200-125) for further genetic analysis.

### Microscopy analysis

Conventional histological techniques were performed on each sample: dehydration via graded ethanol, clearing tissues in xylene, and embedding tissues in Paraplast (Sigma-Aldrich, Cat. No. 145686-99-3). Histological sections were made at five microns and stained with Ehrlich-Eosin Hematoxylin (Sigma-Aldrich, Cat. No. 17372-87-1) to facilitate the description of the structures. Samples were then viewed and imaged via a compound microscope including a digital camera.

### DNA extraction and Y-specific PCR analysis

We collected 25 mg of tissue and we purified DNA using the QIAamp Fast DNA Tissue Kit from QIAGEN (Cat. No. 51404). We verified the integrity of the DNA using 1% agarose gels. All DNA samples were tested for integrity (260/280 and 260/230 ratios >1.8), using a NanoDrop 2000 spectrophotometer (Thermo Scientific), and quantified in a Qubit 4 fluorometer (Thermo Scientific, MA, USA) with the Qubit dsDNA BR Assay kit from the same supplier. We confirmed the presence or absence of a Y chromosome in the samples using Y-specific primers designed previously [24]: *CAMSAP1Y*, forward: AGT CTC AGT CTG CAC CAG TGA AAG, reverse: TGA TTT CTG AGC CCA GGC AGT T. *GOLGA2Y*, forward: AGG CTG TCA GTC TCA CTC AGT AAG, reverse: CCC CAT ATT CCC AGG TTC TGT CA. We verified that PCR reactions worked using primers against *COL1A1* (autosomal/control) forward: TTT CGT GCA GGG TGG GTT CTT T, reverse: TCT GAA CTG GTG CAG CTT CAC A. We used the Phusion Flash High Fidelity from Thermo Fisher Scientific (Cat. No. F548L) with the following program: first 98°C - 10s, then 30 cycles of 98°C - 2s, 66°C - 5s and 72°C - 10s, with a final elongation step at 72°C - 30s. We confirmed the size of the PCR products and the presence of single amplicons in a 1% agarose gel.

### RNA extraction and RNA-seq analysis

We generated strand-specific RNA-seq libraries (using the Illumina TruSeq Stranded mRNA Library protocol) for a total of six samples obtained from whole embryos incubated at 26°C (four samples; three females and one male) and 32°C (two samples; two females). Embryos were sexed using the

above-mentioned Y-specific primers. Each library was sequenced on Illumina HiSeq 2500 platforms at the Macrogen facility in Korea (100 nucleotides, paired-end). We generated 31,910,378 million reads on average ( $\pm$  3,753,014 million reads). We reconstructed a full transcriptome using Trinity (v2.0.2, default k-mer of 25 bp) [27]. Then, RNA-seq reads from 26°C and 32°C samples were mapped to the reconstructed transcriptome using Kallisto (100 bootstraps) [28]. We obtained the estimated counts per transcript and we used the EdgeR package [29] to perform differential expression analyses of transcripts between incubation temperatures (26°C versus 32°C, and vice versa). We used the *edgeR* and *splines* R libraries, TMM (Trimmed Mean of M-values) normalization, FDR (False Discovery Rate) set at 0.0001 given the limited number of replicates at 32°C, from which non-degraded RNA was difficult to obtain. We downloaded from the Ensembl database (<https://www.ensembl.org/>; v.92) the cDNAs and lncRNAs from *A. carolinensis* and we used BLASTn [30] to assign gene identities to the differentially expressed transcripts. When various transcripts for the same gene were differentially expressed, count estimates were added to obtain single values per gene. Enrichment analyses were carried out using Webgestalt (<http://www.webgestalt.org/>), specifying over-representation analysis, the genontology database, and the Biological Process category. RNA-seq data have been deposited to the NCBI-SRA database under BioProject PRJNA766022.

## RESULTS

### Histological analysis showed that ovaries and testes were well-differentiated in stages 35-37 of development

To evaluate the effect of temperature on the embryo's sex, first, we established the developmental stages where gonads were well-differentiated. We observed clear testis-specific and ovary-specific structures in stages 35-37 of embryonic development. During stage 35, the female ovary showed an oval morphology (Fig. 1a). The cortex and the medullary zone were well-differentiated. The cortex is structured by epithelial and germ cells, and the presence of some oogonia were visible. The testicle in stage 35 showed testicular cords in the medullary region together with epithelial cells, the future Sertoli cells (Fig. 1b). Some of these cords presented spermatogonia in the lumen, around the medullary area. In stage 36, the ovary size increased, the cortical zone became thicker showing 2-3 layers of germ cells, closely related to somatic cells or future follicular cells in their thickest part, delimited by a basal lamina of connective tissue, in addition to a greater number of oogonia than in the previous stage (Fig. 1c). Testicles in stage 36 were more elongated, testicular cords increased in

density in the medullary region (Fig. 1d), and spermatogonia were common inside the testicular cords. Finally, in stage 37, connective tissue fibers in the ovaries delimited the cortical zone and the medullary region (Fig. 1e). In the cortical region, the proliferation of oogonia covered the entire region. As for the testicles, in stage 37, the shape was elongated and curved and the entire testicle is made up of testicular cords, which were located more closely to the central area of the spinal cord. Large spermatogonia became abundant inside the testicular cords, while Sertoli cells are peripheral to the testicular cords (Fig. 1f).

**Fig. 1. Ovaries and testes at stages 35-37 of development in *B. vittatus* embryos.** a) histology of the ovary in stage 35. b) histology of the testis in stage 35. c) histology of the ovary in stage 36. d) histology of the testis in stage 36. e) histology of the ovary in stage 37. f) histology of the testis in stage 37.

# **No effect of incubation temperatures on the sex of *B. vittatus* embryos**

Next, we performed experiments to evaluate whether the sex of the embryos was affected by different incubation temperatures, including typical male-producing (26°C) and female-producing (32°C) temperatures. To do so, we contrasted genotypic data (i.e., presence/absence of the Y chromosome) against the histology of the gonads from stages 35-37 (i.e., presence of testicular or ovarian structures) at three incubation temperatures (26°C, 29°C, and 32°C). If *B. vittatus* presented temperature-dependent sex reversal, specific genotypes would not necessarily develop the expected gonads. For example, in a male-to-female sex reversal, individuals with a Y chromosome would develop ovaries.

We analyzed a total of 48 embryos. At 26°C we observed eight embryos with a Y chromosome and four embryos without a Y chromosome (Fig. 2). At 29°C we observed 11 embryos with a Y chromosome and seven embryos without a Y chromosome (Fig. 2). At 32°C we observed nine embryos with a Y chromosome and nine embryos without a Y chromosome (Fig. 2). We detected the same frequency of males and females at the three temperatures ( $\chi^2$  test,  $P > 0.05$ ). Moreover, after contrasting the genotype of the embryos against their gonads, we found that embryos with a Y chromosome developed testes in all instances. Similarly, embryos without a Y chromosome always developed ovaries (Fig. 2).

**Fig. 2. Number of embryos according to the incubation temperature, genotype, and histology.** Histogram showing the number of *B. vittatus* embryos with a Y chromosome that developed testes (*Ychr+ts*; no sex reversal), the number of embryos lacking a Y chromosome that developed ovaries (*noY+ov*; no sex reversal), the number of embryos with a Y chromosome that developed ovaries (*Ychr+ov*; male-to-female sex reversal), and the number of embryos without a Y chromosome that developed testes (*noY+ts*; female-to-male sex reversal).

### Differential expression analysis of transcriptomic data

We performed a differential expression analysis of RNA-seq data from embryos incubated at 26°C versus embryos incubated at 32°C. We found 272 genes that were over-expressed at 26°C and 136 genes that were over-expressed at 32°C (S1 Table). Enrichment analysis of GO terms showed that differentially expressed genes were associated, as expected, with biological processes that are common during embryonic development. Interestingly, however, genes over-expressed at 26°C were more frequently associated with neuron development (Table 1), whereas genes over-expressed at 32°C were mostly associated with muscle development (Table 2).

**Table 1. GO terms enrichment of genes over-expressed at 26°C**

| Gene Set   | Description                                                        | Size | Expect | Ratio | P Value  | FDR      |
|------------|--------------------------------------------------------------------|------|--------|-------|----------|----------|
| GO:0048666 | neuron development                                                 | 1068 | 15.382 | 3.251 | 7.57E-14 | 6.88E-10 |
| GO:0010975 | regulation of neuron projection development                        | 475  | 6.8411 | 4.678 | 3.48E-13 | 1.58E-09 |
| GO:0030030 | cell projection organization                                       | 1522 | 21.92  | 2.692 | 9.84E-13 | 2.98E-09 |
| GO:0120036 | plasma membrane bounded cell projection organization               | 1488 | 21.431 | 2.66  | 4.33E-12 | 9.83E-09 |
| GO:0120035 | regulation of plasma membrane bounded cell projection organization | 665  | 9.5775 | 3.759 | 6.61E-12 | 1.20E-08 |
| GO:0022604 | regulation of cell morphogenesis                                   | 473  | 6.8123 | 4.404 | 9.31E-12 | 1.26E-08 |
| GO:0031344 | regulation of cell projection organization                         | 674  | 9.7072 | 3.709 | 9.72E-12 | 1.26E-08 |
| GO:0031175 | neuron projection development                                      | 940  | 13.538 | 3.176 | 1.23E-11 | 1.39E-08 |
| GO:0030182 | neuron differentiation                                             | 1313 | 18.91  | 2.697 | 4.67E-11 | 4.72E-08 |
| GO:0000902 | cell morphogenesis                                                 | 982  | 14.143 | 2.97  | 1.81E-10 | 1.55E-07 |

**Table 2. GO terms enrichment of genes over-expressed at 32°C**

| Gene Set   | Description           | Size | Expect | Ratio | P Value | FDR |
|------------|-----------------------|------|--------|-------|---------|-----|
| GO:0003012 | muscle system process | 423  | 3.1984 | 8.754 | 0       | 0   |
| GO:0006936 | muscle contraction    | 339  | 2.5633 | 9.753 | 0       | 0   |



|            |                                                       |     |         |       |          |          |
|------------|-------------------------------------------------------|-----|---------|-------|----------|----------|
| GO:0030239 | myofibril assembly                                    | 67  | 0.5066  | 25.66 | 2.44E-15 | 7.40E-12 |
| GO:0010927 | cellular component assembly involved in morphogenesis | 106 | 0.80149 | 17.47 | 5.62E-14 | 1.28E-10 |
| GO:0031032 | actomyosin structure organization                     | 184 | 1.3913  | 11.5  | 6.27E-13 | 1.14E-09 |
| GO:0097435 | supramolecular fiber organization                     | 640 | 4.8392  | 5.373 | 1.61E-12 | 2.44E-09 |
| GO:0055001 | muscle cell development                               | 166 | 1.2552  | 11.95 | 1.97E-12 | 2.56E-09 |
| GO:0030240 | skeletal muscle thin filament assembly                | 14  | 0.10586 | 66.13 | 3.92E-12 | 4.46E-09 |
| GO:0055002 | striated muscle cell development                      | 153 | 1.1569  | 12.1  | 9.45E-12 | 9.54E-09 |
| GO:0014866 | skeletal myofibril assembly                           | 16  | 0.12098 | 57.86 | 1.29E-11 | 1.17E-08 |

Although we did not detect thermal-induced sex reversal in *B. vittatus* within the 26°C-32°C temperature range, we examined the differentially expressed transcripts in further detail. We found that specific isoforms of *JARID2* and *KDM6B* were over-expressed at 26°C (Table 3; S1 Table). Remarkably, *JARID2* was the top-second gene with the highest expression difference between 26°C and 32°C (LogFoldChage = -5.2891, FDR = 8.96E-12; Table 3). For both genes, the isoforms that were differentially expressed appeared to have retained an intron. In *JARID2*, the retained intron corresponds to intron 15, the third to last intron (Fig. 3), which is the same retained intron that was previously reported for *T. scripta*, *A. mississippiensis*, and *P. vitticeps* [16]. In contrast, *KDM6B* retained the last intron, intron 18, instead of the second to last that was reported in the other species [16]. Careful examination of *KDM6B* using blastn alignments indicated, contrary to *JARID2*, that the isoform did not retain the full sequence of intron 18. Instead, three shorter sections of intron 18 were included in the *KDM6B* isoform (Fig. 3).

**Fig. 3. Exon and intron structure of differentially expressed isoforms of *JARID2* and *KDM6B*.** a) Diagram of the exon/intron structure of the *JARID2* isoform from *B. vittatus* that is over-expressed at 26°C. Exons are shown as dark blue rectangles, introns are shown as light blue lines. Blastn matches to exonic sequences are shown as yellow rectangles, whereas matches to intronic sequences are indicated by pink rectangles. The green bar represents the reference genome of *A. carolinensis*. Blastn alignments were performed against this reference genome. b) Same as in a) but for the *KDM6B* isoform from *B. vittatus* that is over-expressed at 26°C.

**Table 3. Estimated read counts for *JARID2* and *KDM6B* (differentially expressed isoforms)**

| FoldChange | FDR | embryos at 32°C |      | embryos at 26°C |      |      |      |
|------------|-----|-----------------|------|-----------------|------|------|------|
|            |     | rep1            | rep2 | rep1            | rep2 | rep3 | rep4 |

|        |         |          |     |     |      |      |      |      |
|--------|---------|----------|-----|-----|------|------|------|------|
| JARID2 | -5.2891 | 8.96E-12 | 307 | 380 | 3635 | 2143 | 8742 | 5135 |
| KDM6B  | -3.3684 | 0.000159 | 150 | 125 | 1305 | 933  | 5716 | 1964 |

## All embryos had hemipenes; sex has to be established through histology of gonads or genotypic analysis

It should be noted that 100% of the embryos presented intrusive organs (hemipenes), regardless of their genotype (presence/absence of the Y chromosome) or whether the embryos carried testes or ovaries. The presence of copulatory organs was observed from stage 35 (Fig. 4a,d). The morphology in this stage corresponded to a prominent lobe that becomes slightly larger. Hemipenes became bilobed in stage 36, with blood supply throughout the entire phallus (Fig. 4b,e). By stage 37, hemipenes were bifurcated and bilobed with blood supply only in the apical part (Fig. 4c,f).

**Fig. 4. Hemipenes are present in both male and female embryos.** Females showing hemipenes in a) stage 35, b) stage 36, c) and stage 37. Males showing hemipenes in d) stage 35, e) stage 36, and f) stage 37. Black arrows point at the hemipenes.

## DISCUSSION

Casque-headed lizards are the only group of pleurodonts that transitioned from the ancestral XY system to a more recent pair of XY chromosomes. The evolutionary forces that triggered this transition have remained unclear. Here, we tested whether *B. vittatus* showed temperature-dependent sex reversal and whether we could detect genetic signatures of an ancestral TSD system; having a latent sex determination system could facilitate transitions between sex determination systems. We contrasted genotypic data and histological data of embryos from stages 35-37 incubated at three different temperatures. We found no effect of incubation temperatures on the development of gonads: embryos with a Y chromosome developed testes, whereas embryos without a Y chromosome developed ovaries. Thus, *B. vittatus* does not appear to show temperature-dependent sex reversal within the 26-32°C temperature range. We selected these incubation temperatures because they are common male-producing or female-producing temperatures in non-

avian reptiles and because they represent average temperatures during the reproductive season of *B. vittatus* [31].

Remarkably, we observed that *JARID2* was the top-second gene with the highest expression difference between low and high incubation temperatures. We found that at a lower temperature (26°C) *JARID2* retained the same intron that was previously reported for *T. scripta*, *A. mississippiensis*, and *P. vitticeps* at male-producing temperatures [16]. Our results suggest that the alternative splicing of *JARID2* is a common trait across non-avian reptiles and appears to be a reminiscence of an ancestral response to temperature [32]. We showed that the new pair of XY chromosomes are dominant, however, it is still not clear whether the two XY systems co-existed or whether a potentially latent TSD system facilitated the transition. Future work could explore whether more extreme incubation temperatures may trigger sex reversal and the nature of the signaling cascades controlled by the temperature-specific isoforms of *JARID2*.

In contrast, the differentially expressed isoform of *KDM6B* did not show the expected pattern since it retained shorter sections of the last intron rather than the complete sequence of the second to last intron. This pattern is rather consistent with *KDM6B* showing alternative 3'-UTR and could indicate that only the *JARID2*-dependent pathway is still sensitive to temperature changes in pleurodonts.

Differential expression analyses showed that genes related to neuron development were over-expressed at lower temperatures, whereas genes related to muscular development were over-expressed at higher incubation temperatures. Embryonic development is boosted at elevated incubation temperatures, however, we found that tissues responded differently to temperature. Finally, our work examined for the first time to our knowledge the development of gonad during stages 35-37 in a member of the *Corytophanidae* family. We found that gonads were well-differentiated and increased in size and cellular density during these stages. Intriguingly, we found that all embryos showed hemipenes during stages 35-37. This result suggests heterochrony in the regression of hemipenes in females (i. e., both gonad and genital structures development may not be closely coordinated), as it occurs in just three phylogenetically distant lizards [33-35].

## Acknowledgements

To Ana E. López-Moreno, Ailed Pérez-Pérez and Orlando Suárez-Rodríguez for aiding in the collection of lizards. We also thank the community of La Selva del Marinero for field assistance.

## Authors' contributions

G.S.-V., D.C., and O.H.-G. designed the study. G.S.-V., E.M.-C., A.A., M.V.-S.-C., and D.C. performed the analyses. All authors contributed to the interpretation of the results. G.S.-V., D.C. and O.H.-G. wrote the article. All authors read and approved the final article.

## Supporting information

**S1 Table:** Differentially expressed genes found in this study.

## Data availability

RNA-seq data have been deposited to the NCBI-SRA database under BioProject PRJNA766022.

## Ethics declarations

Permission for fieldwork and sampling was granted by the Secretaría del Medioambiente y Recursos Naturales (SEMARNAT Scientific Collector Permit 08-043).

## REFERENCES

1. Pincheira-Donoso D, Bauer AM, Meiri S, Uetz P. Global taxonomic diversity of living reptiles. *PLoS One*. 2013;8(3):e59741. Epub 2013/04/02. doi: 10.1371/journal.pone.0059741. PubMed PMID: 23544091; PubMed Central PMCID: PMC3609858.
2. Bachtrog D, Mank JE, Peichel CL, Kirkpatrick M, Otto SP, Ashman TL, et al. Sex determination: why so many ways of doing it? *PLoS Biol*. 2014;12(7):e1001899. doi: 10.1371/journal.pbio.1001899. PubMed PMID: 24983465; PubMed Central PMCID: PMC4077654.
3. Sarre SD, Georges A, Quinn A. The ends of a continuum: genetic and temperature-dependent sex determination in reptiles. *Bioessays*. 2004;26(6):639-45. Epub 2004/06/02. doi: 10.1002/bies.20050. PubMed PMID: 15170861.
4. Shine R, Elphick MJ, Donnellan S. Co-occurrence of multiple, supposedly incompatible modes of sex determination in a lizard population. *Ecology Letters*. 2002;5(4):486-9.
5. Whiteley SL, Castelli MA, Dissanayake DSB, Holleley CE, Georges A. Temperature-Induced Sex Reversal in Reptiles: Prevalence, Discovery, and Evolutionary Implications. *Sex Dev*. 2021;15(1-3):148-56. Epub 2021/06/11. doi: 10.1159/000515687. PubMed PMID: 34111872.

6. Hill PL, Burrridge CP, Ezaz T, Wapstra E. Conservation of Sex-Linked Markers among Conspecific Populations of a Viviparous Skink, *Niveoscincus ocellatus*, Exhibiting Genetic and Temperature-Dependent Sex Determination. *Genome Biol Evol.* 2018;10(4):1079-87. doi: 10.1093/gbe/evy042. PubMed PMID: 29659810; PubMed Central PMCID: PMC5905450.
7. Robert KA, Thompson MB. Sex determination. Viviparous lizard selects sex of embryos. *Nature.* 2001;412(6848):698-9. doi: 10.1038/35089135. PubMed PMID: 11507628.
8. Cornejo-Paramo P, Dissanayake DSB, Lira-Noriega A, Martinez-Pacheco ML, Acosta A, Ramirez-Suastegui C, et al. Viviparous Reptile Regarded to Have Temperature-Dependent Sex Determination Has Old XY Chromosomes. *Genome Biol Evol.* 2020;12(6):924-30. Epub 2020/05/21. doi: 10.1093/gbe/evaa104. PubMed PMID: 32433751; PubMed Central PMCID: PMC7313667.
9. Holleley CE, O'Meally D, Sarre SD, Marshall Graves JA, Ezaz T, Matsubara K, et al. Sex reversal triggers the rapid transition from genetic to temperature-dependent sex. *Nature.* 2015;523(7558):79-82. doi: 10.1038/nature14574. PubMed PMID: 26135451.
10. Quinn AE, Georges A, Sarre SD, Guarino F, Ezaz T, Graves JA. Temperature sex reversal implies sex gene dosage in a reptile. *Science.* 2007;316(5823):411. doi: 10.1126/science.1135925. PubMed PMID: 17446395.
11. Radder RS, Quinn AE, Georges A, Sarre SD, Shine R. Genetic evidence for co-occurrence of chromosomal and thermal sex-determining systems in a lizard. *Biol Lett.* 2008;4(2):176-8. doi: 10.1098/rsbl.2007.0583. PubMed PMID: 18089519; PubMed Central PMCID: PMC2429925.
12. Quinn AE, Radder RS, Sarre SD, Georges A, Ezaz T, Shine R. Isolation and development of a molecular sex marker for *Bassiana duperreyi*, a lizard with XX/XY sex chromosomes and temperature-induced sex reversal. *Mol Genet Genomics.* 2009;281(6):665-72. Epub 2009/03/12. doi: 10.1007/s00438-009-0437-7. PubMed PMID: 19277717.
13. Pennell MW, Mank JE, Peichel CL. Transitions in sex determination and sex chromosomes across vertebrate species. *Mol Ecol.* 2018. doi: 10.1111/mec.14540. PubMed PMID: 29451715.
14. Gamble T, Coryell J, Ezaz T, Lynch J, Scantlebury DP, Zarkower D. Restriction Site-Associated DNA Sequencing (RAD-seq) Reveals an Extraordinary Number of Transitions among Gecko Sex-Determining Systems. *Mol Biol Evol.* 2015;32(5):1296-309. doi: 10.1093/molbev/msv023. PubMed PMID: 25657328.
15. Sabath N, Itescu Y, Feldman A, Meiri S, Mayrose I, Valenzuela N. Sex determination, longevity, and the birth and death of reptilian species. *Ecol Evol.* 2016;6(15):5207-20. doi: 10.1002/ece3.2277. PubMed PMID: 27551377; PubMed Central PMCID: PMC4984498.
16. Deveson IW, Holleley CE, Blackburn J, Marshall Graves JA, Mattick JS, Waters PD, et al. Differential intron retention in Jumonji chromatin modifier genes is implicated in reptile temperature-dependent sex determination. *Sci Adv.* 2017;3(6):e1700731. doi: 10.1126/sciadv.1700731. PubMed PMID: 28630932; PubMed Central PMCID: PMC5470834.
17. Georges A, Ezaz T, Quinn AE, Sarre SD. Are reptiles predisposed to temperature-dependent sex determination? *Sex Dev.* 2010;4(1-2):7-15. doi: 10.1159/000279441. PubMed PMID: 20110654.
18. Dissanayake DSB, Holleley CE, Deakin JE, Georges A. High elevation increases the risk of Y chromosome loss in Alpine skink populations with sex reversal. *Heredity (Edinb).* 2021;126(5):805-16. Epub 2021/02/03. doi: 10.1038/s41437-021-00406-z. PubMed PMID: 33526811; PubMed Central PMCID: PMC8102603.
19. Ge C, Ye J, Weber C, Sun W, Zhang H, Zhou Y, et al. The histone demethylase KDM6B regulates temperature-dependent sex determination in a turtle species. *Science.* 2018;360(6389):645-8. Epub 2018/05/12. doi: 10.1126/science.aap8328. PubMed PMID: 29748283.

20. Czerwinski M, Natarajan A, Barske L, Looger LL, Capel B. A timecourse analysis of systemic and gonadal effects of temperature on sexual development of the red-eared slider turtle *Trachemys scripta elegans*. *Dev Biol*. 2016;420(1):166-77. Epub 2016/09/28. doi: 10.1016/j.ydbio.2016.09.018. PubMed PMID: 27671871.
21. Altmanova M, Rovatsos M, Johnson Pokorna M, Vesely M, Wagner F, Kratochvil L. All iguana families with the exception of basilisks share sex chromosomes. *Zoology (Jena)*. 2018;126:98-102. doi: 10.1016/j.zool.2017.11.007. PubMed PMID: 29287619.
22. Rovatsos M, Pokorna M, Altmanova M, Kratochvil L. Cretaceous park of sex determination: sex chromosomes are conserved across iguanas. *Biol Lett*. 2014;10(3):20131093. doi: 10.1098/rsbl.2013.1093. PubMed PMID: 24598109; PubMed Central PMCID: PMC3982436.
23. Marin R, Cortez D, Lamanna F, Pradeepa MM, Leushkin E, Julien P, et al. Convergent origination of a *Drosophila*-like dosage compensation mechanism in a reptile lineage. *Genome Res*. 2017;27(12):1974-87. doi: 10.1101/gr.223727.117. PubMed PMID: 29133310; PubMed Central PMCID: PMC5741051.
24. Acosta A, Suarez-Varon G, Rodriguez-Miranda LA, Lira-Noriega A, Aguilar-Gomez D, Gutierrez-Mariscal M, et al. Corytophanids Replaced the Pleurodont XY System with a New Pair of XY Chromosomes. *Genome Biol Evol*. 2019;11(9):2666-77. Epub 2019/09/27. doi: 10.1093/gbe/evz196. PubMed PMID: 31557287.
25. Nielsen SV, Guzman-Mendez IA, Gamble T, Blumer M, Pinto BJ, Kratochvil L, et al. Escaping the evolutionary trap? Sex chromosome turnover in basilisks and related lizards (Corytophanidae: Squamata). *Biol Lett*. 2019;15(10):20190498. Epub 2019/10/09. doi: 10.1098/rsbl.2019.0498. PubMed PMID: 31594492; PubMed Central PMCID: PMC6832183.
26. Dufaure JP, Hubert J. Table de développement du lézard vivipare: *Lacerta (Zootoca) vivipara* jacquin. *Arch Anat Microsc Morphol Exp*. 1961;50:309-28.
27. Grabherr MG, Haas BJ, Yassour M, Levin JZ, Thompson DA, Amit I, et al. Full-length transcriptome assembly from RNA-Seq data without a reference genome. *Nat Biotechnol*. 2011;29(7):644-52. doi: 10.1038/nbt.1883. PubMed PMID: 21572440; PubMed Central PMCID: PMC3571712.
28. Bray NL, Pimentel H, Melsted P, Pachter L. Near-optimal probabilistic RNA-seq quantification. *Nat Biotechnol*. 2016;34(5):525-7. doi: 10.1038/nbt.3519. PubMed PMID: 27043002.
29. Robinson MD, McCarthy DJ, Smyth GK. edgeR: a Bioconductor package for differential expression analysis of digital gene expression data. *Bioinformatics*. 2010;26(1):139-40. Epub 2009/11/17. doi: 10.1093/bioinformatics/btp616. PubMed PMID: 19910308; PubMed Central PMCID: PMC2796818.
30. Altschul SF, Gish W, Miller W, Myers EW, Lipman DJ. Basic local alignment search tool. *Journal of molecular biology*. 1990;215(3):403-10. doi: 10.1016/S0022-2836(05)80360-2. PubMed PMID: 2231712.
31. Cornejo-Paramo P, Lira-Noriega A, Ramirez-Suastegui C, Mendez-de-la-Cruz FR, Szekely T, Urrutia AO, et al. Sex determination systems in reptiles are related to ambient temperature but not to the level of climatic fluctuation. *BMC Evol Biol*. 2020;20(1):103. Epub 2020/08/19. doi: 10.1186/s12862-020-01671-y. PubMed PMID: 32807071; PubMed Central PMCID: PMC7433102.
32. Haltenhof T, Kotte A, De Bortoli F, Schiefer S, Meinke S, Emmerichs AK, et al. A Conserved Kinase-Based Body-Temperature Sensor Globally Controls Alternative Splicing and Gene Expression. *Mol Cell*. 2020;78(1):57-69 e4. Epub 2020/02/16. doi: 10.1016/j.molcel.2020.01.028. PubMed PMID: 32059760.

33. Martinez-Torres M, Rubio-Morales B, Pina-Amado JJ, Luis J. Hemipenes in females of the Mexican viviparous lizard *Barisia imbricata* (Squamata: Anguidae): an example of heterochrony in sexual development. *Evol Dev.* 2015;17(5):270-7. Epub 2015/09/16. doi: 10.1111/ede.12134. PubMed PMID: 26372061.
34. Neaves L, Wapstra E, Birch D, Girling JE, Joss JM. Embryonic gonadal and sexual organ development in a small viviparous skink, *Niveoscincus ocellatus*. *J Exp Zool A Comp Exp Biol.* 2006;305(1):74-82. Epub 2005/12/17. doi: 10.1002/jez.a.249. PubMed PMID: 16358273.
35. Whiteley SL, Weisbecker V, Georges A, Gauthier ARG, Whitehead DL, Holleley CE. Developmental asynchrony and antagonism of sex determination pathways in a lizard with temperature-induced sex reversal. *Sci Rep.* 2018;8(1):14892. Epub 2018/10/07. doi: 10.1038/s41598-018-33170-y. PubMed PMID: 30291276; PubMed Central PMCID: PMCPMC6173690.



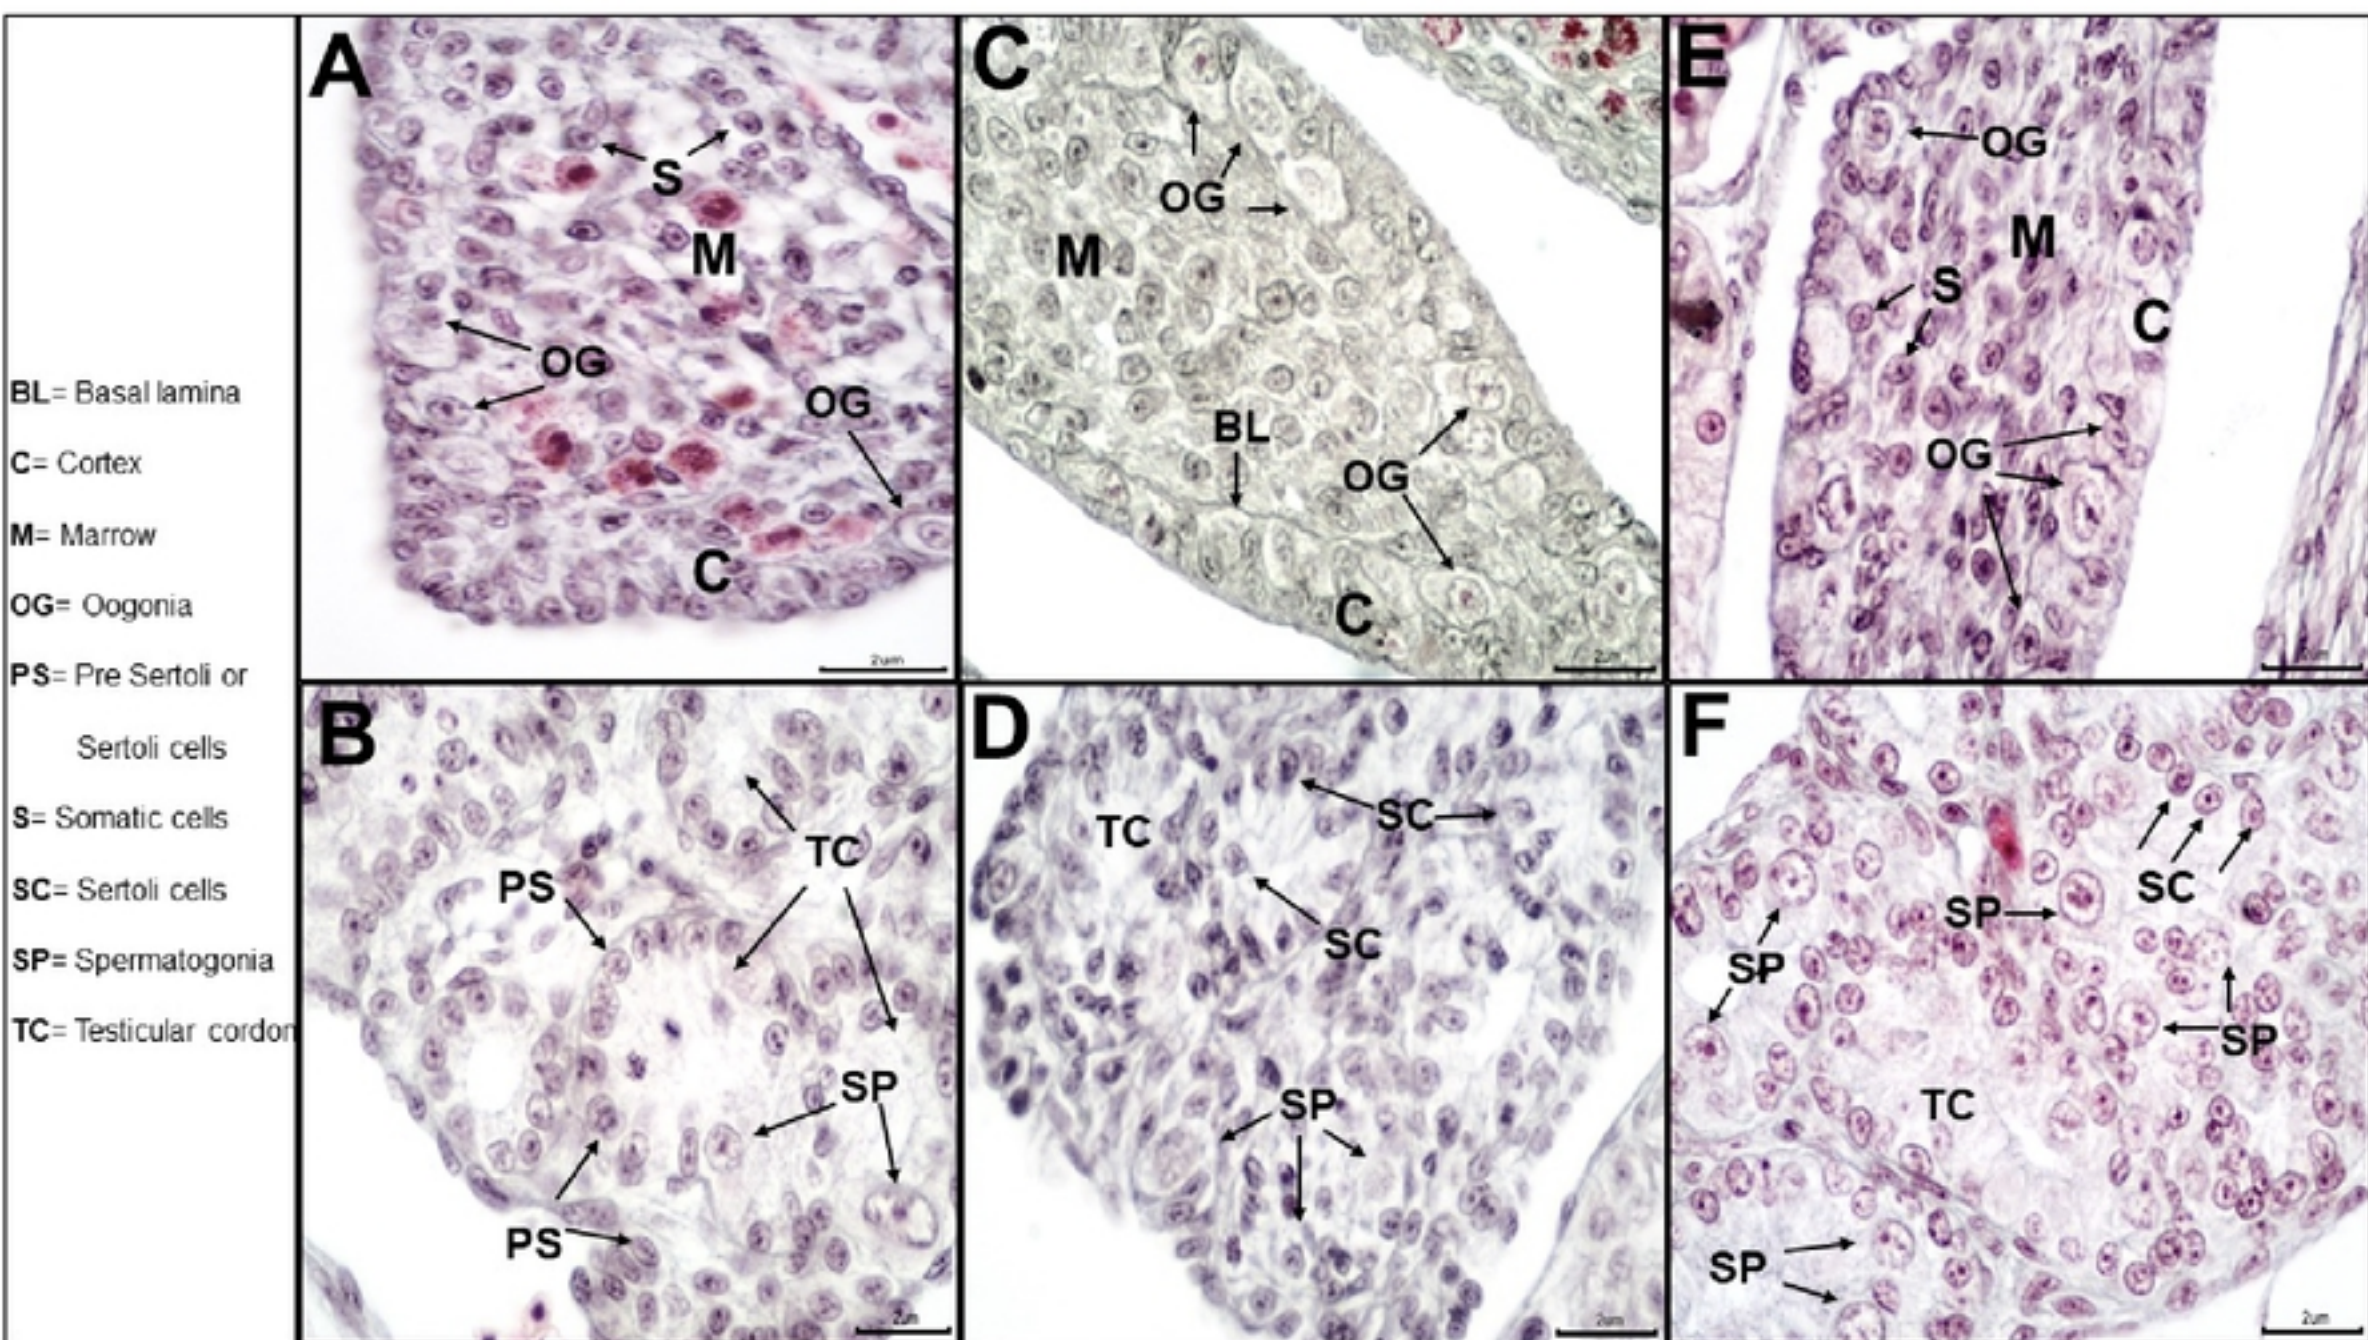

Figure1



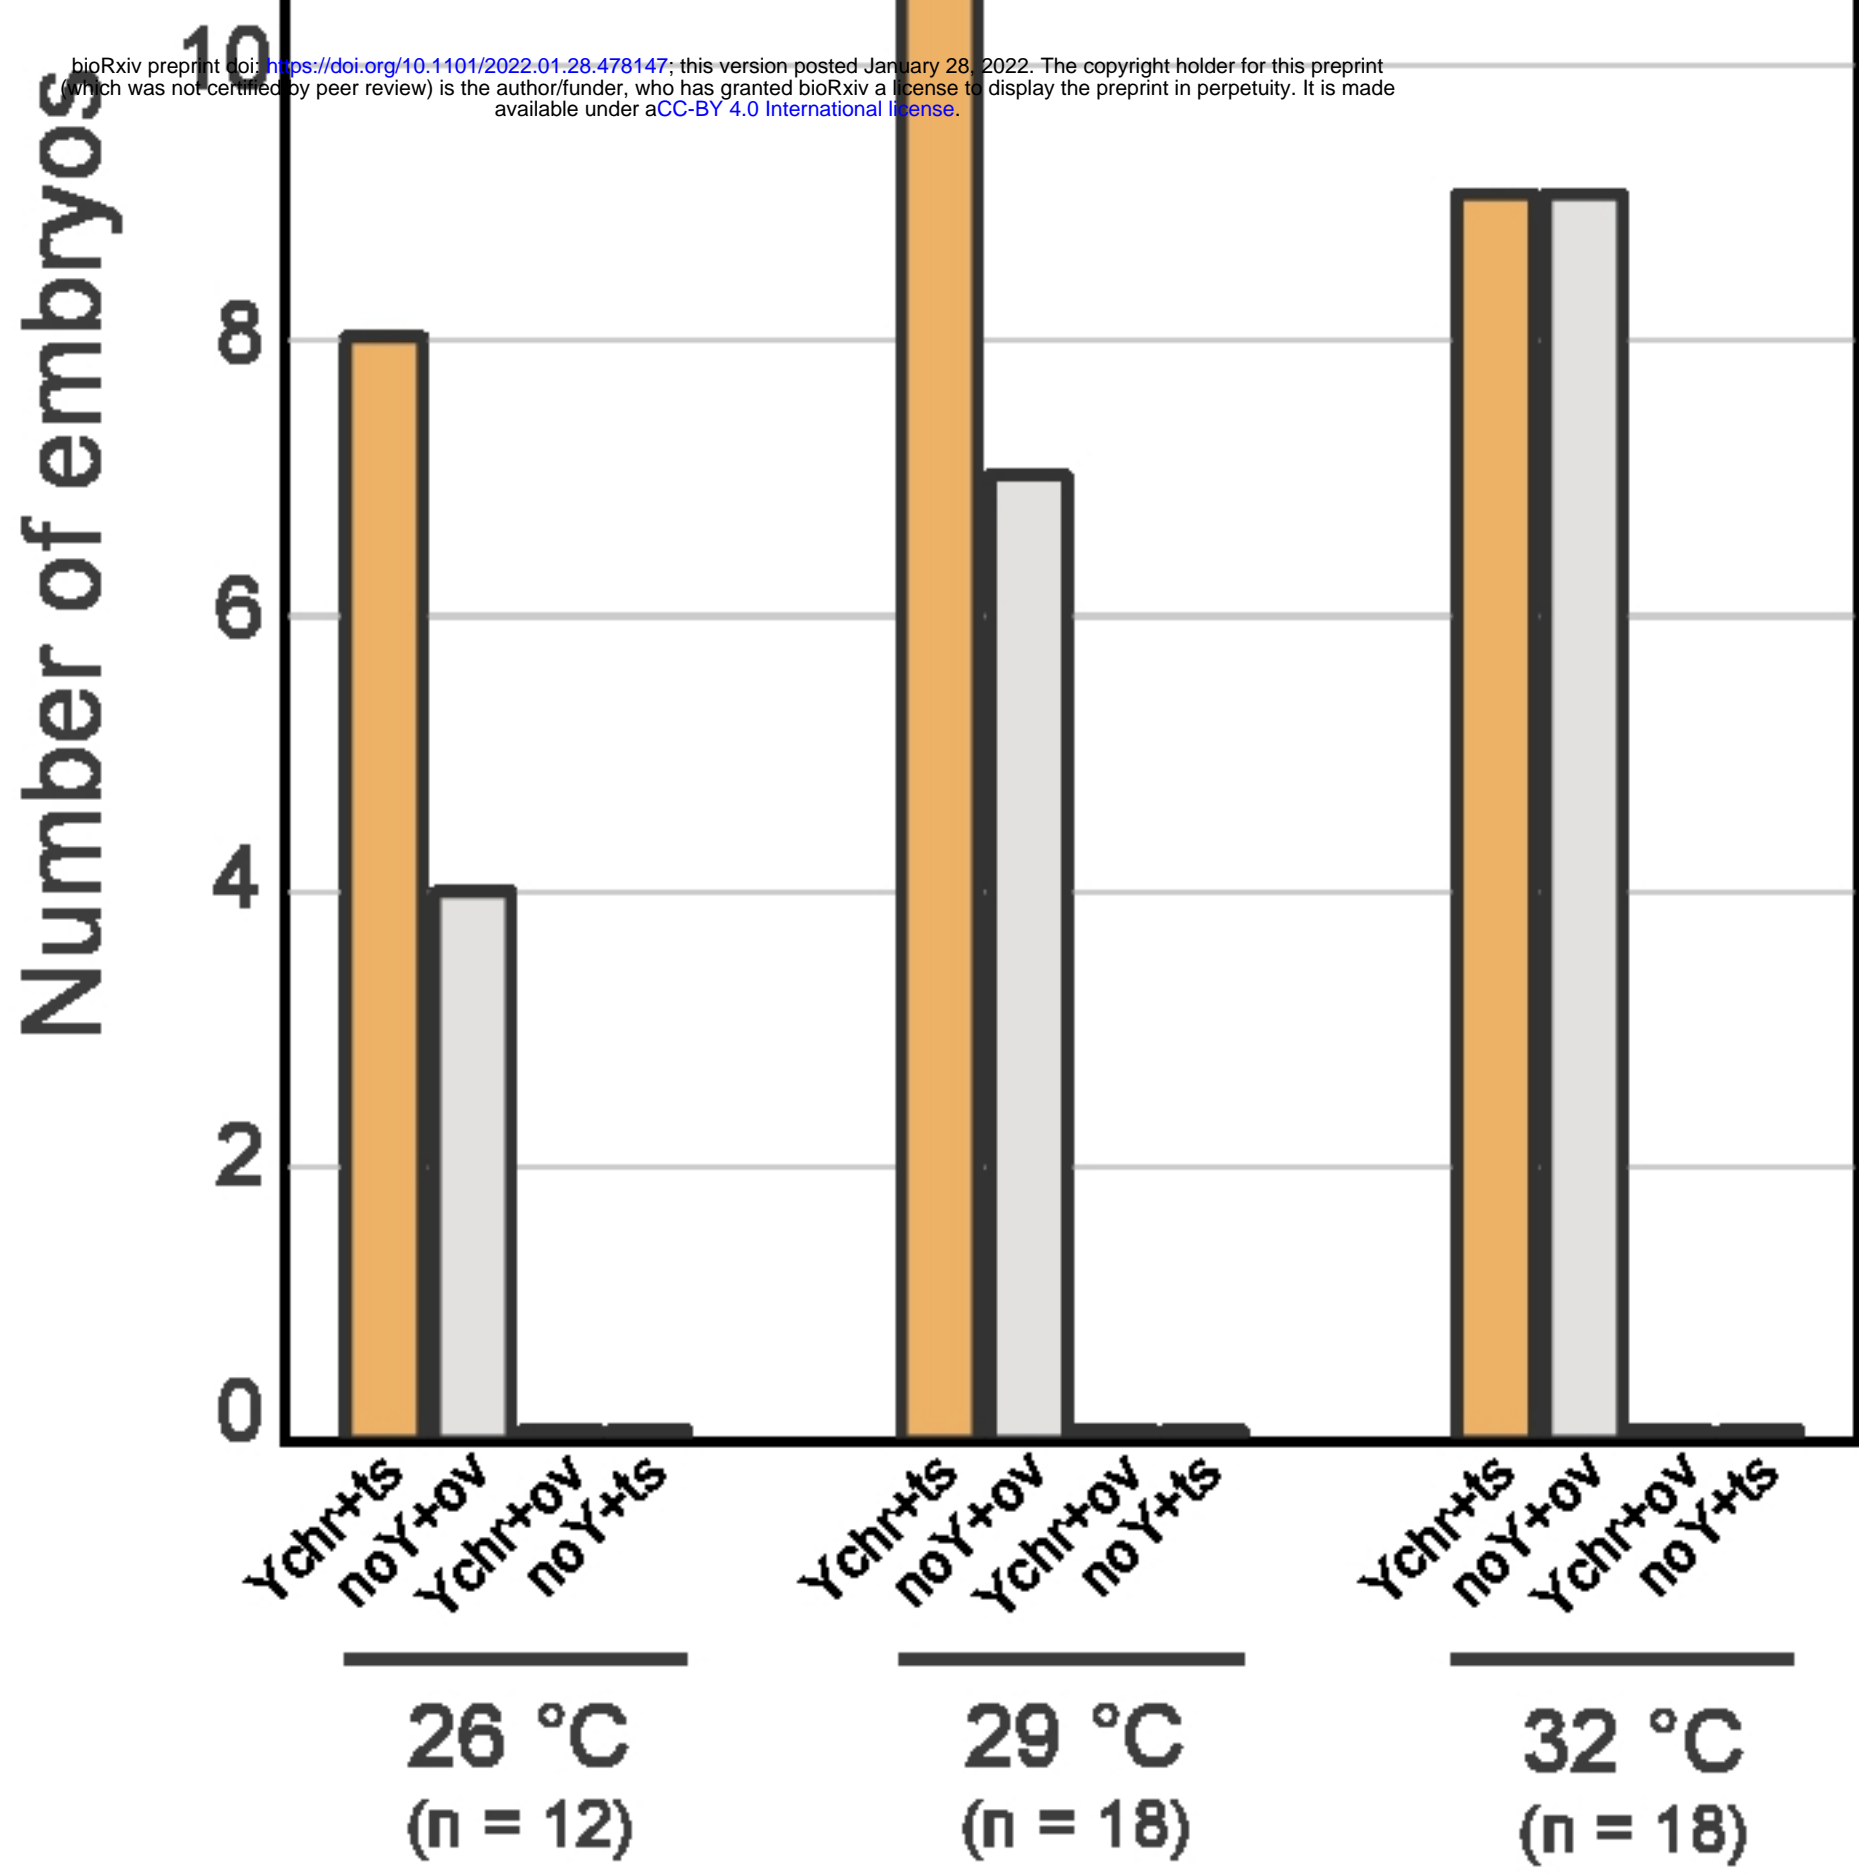

Figure2

a)

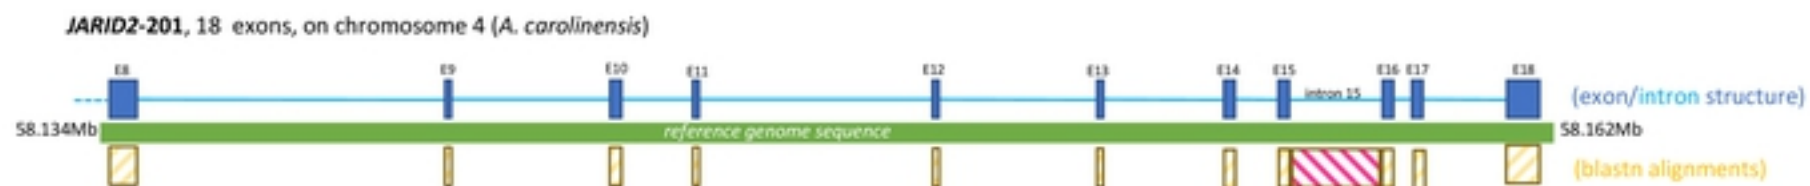

b)

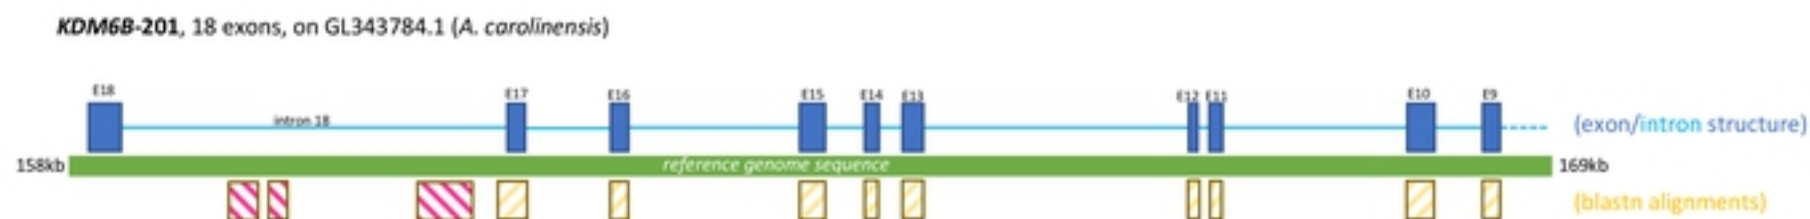

Figure3

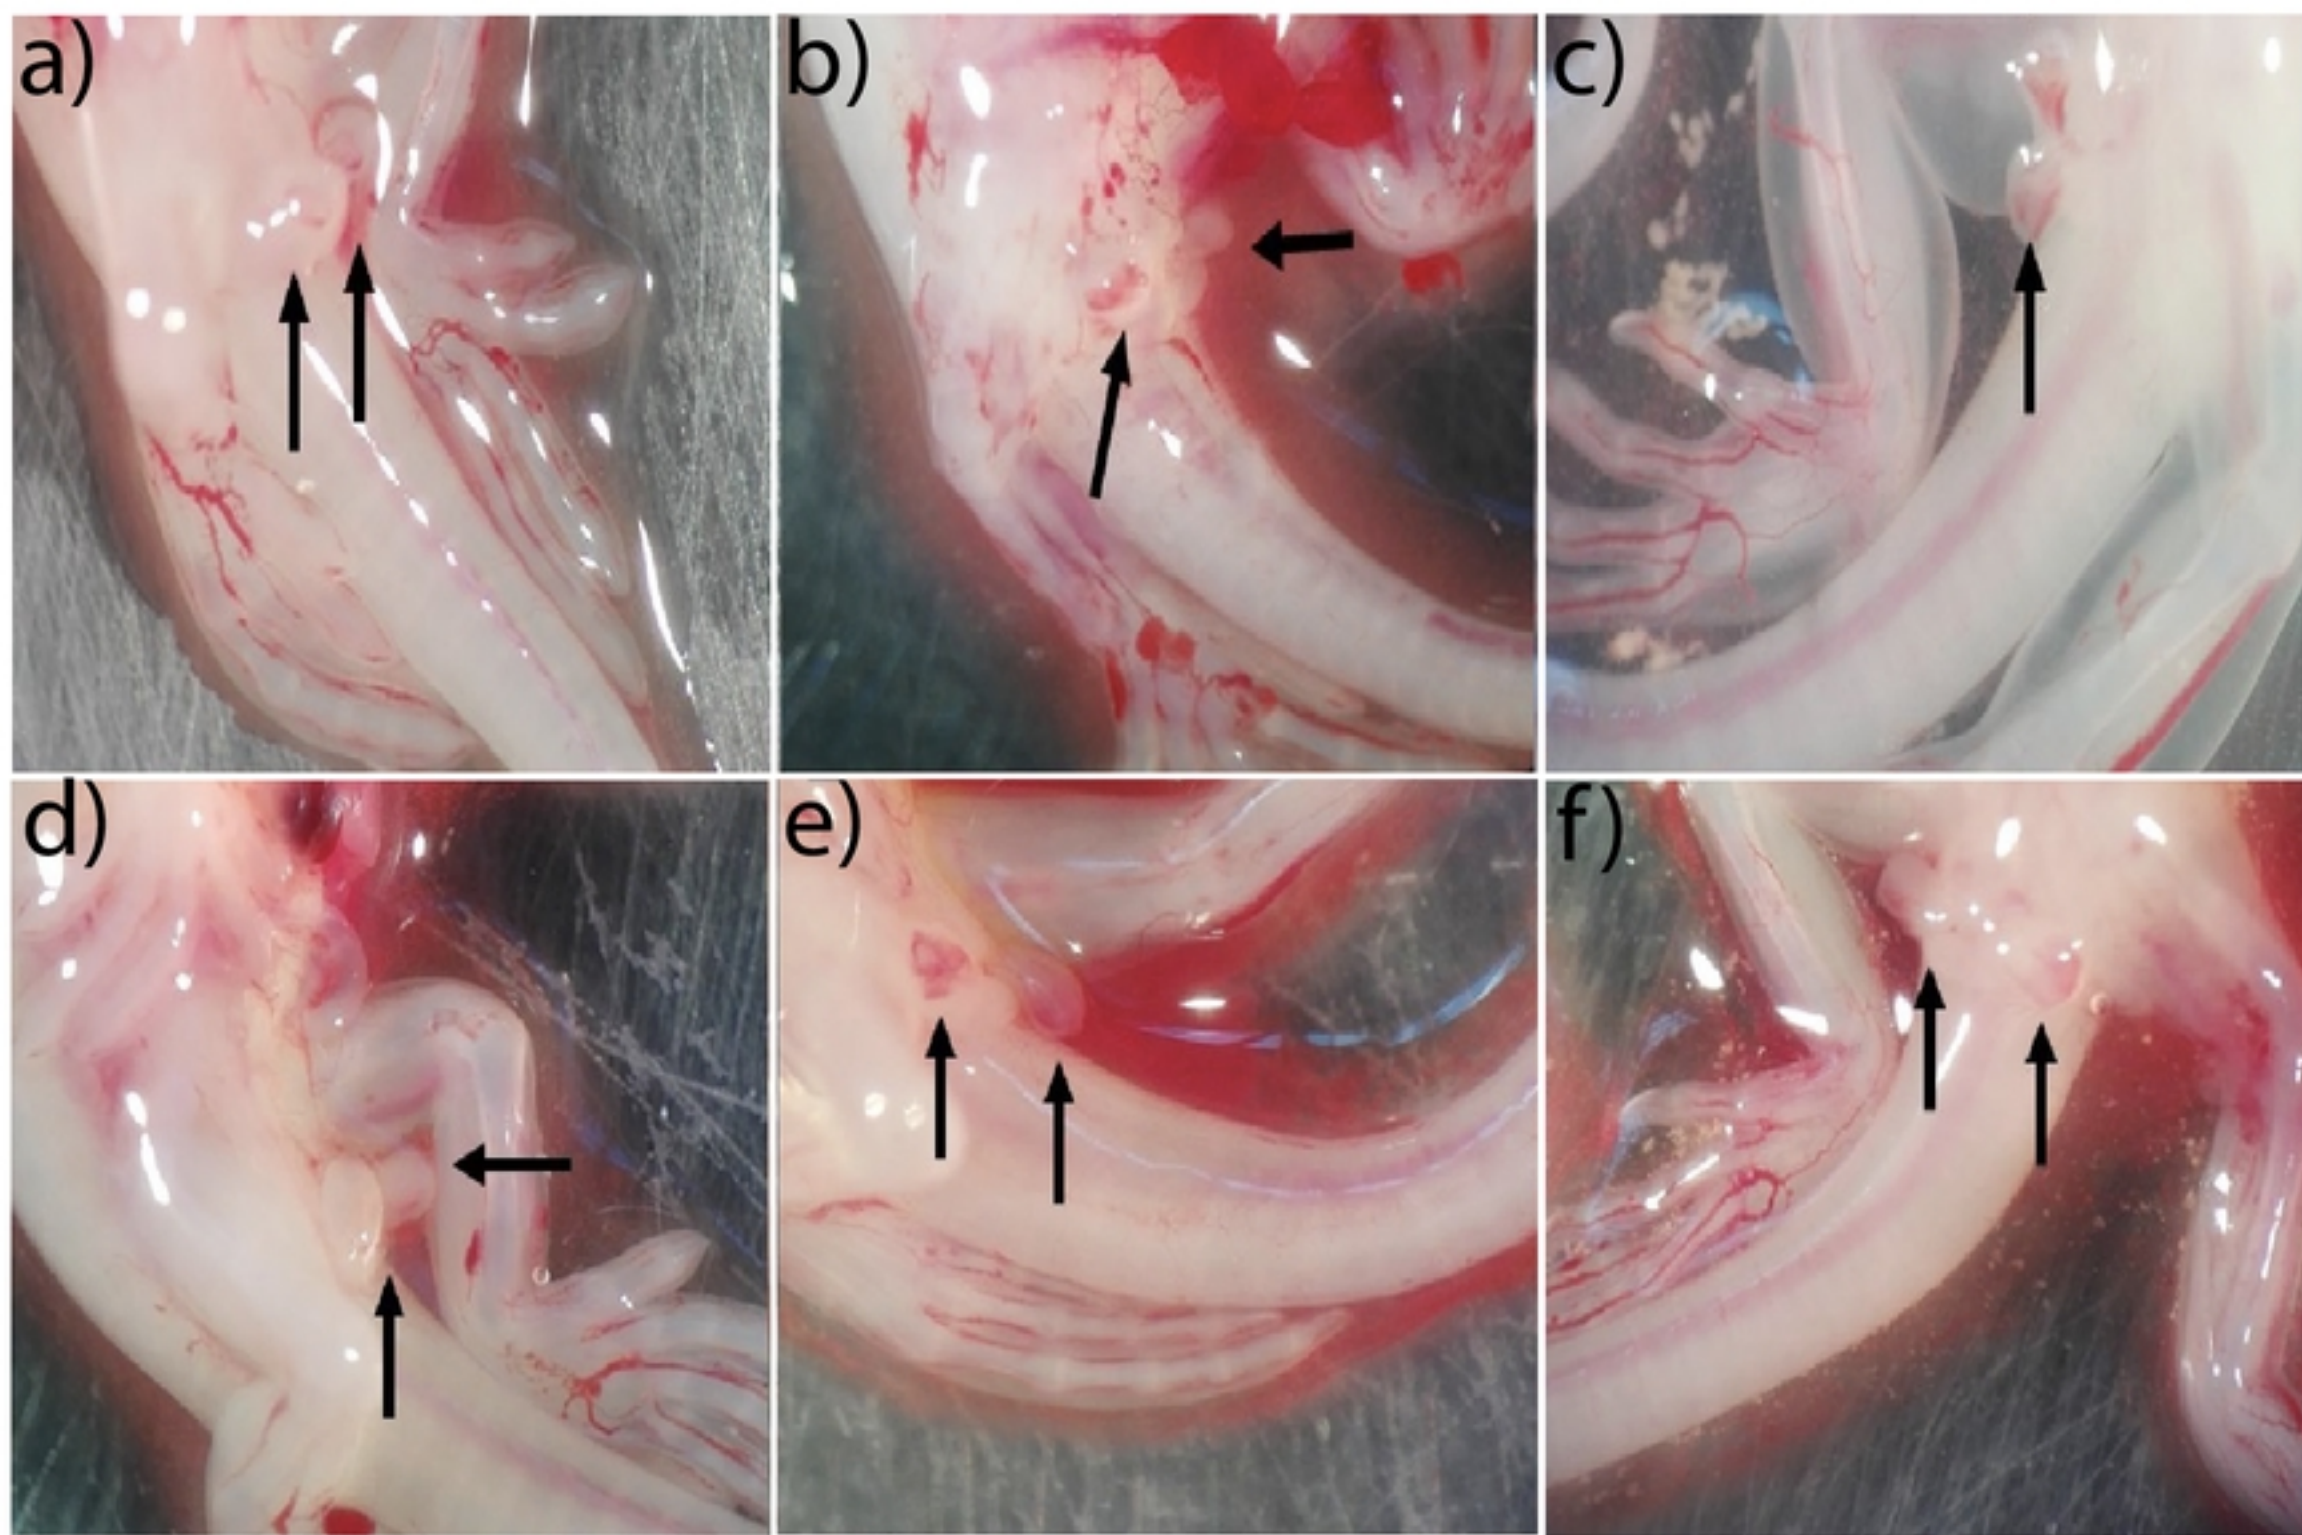

Figure4
